# Supplementary material for: On-water synthesis of phenols using biogenic Cu2O nanoparticles without using H2O2
Source: Royal Society of Chemistry journal article supplement (doi:10.1039/c6ra22972g), 2016-01-01

*Supporting information for*

**On-water synthesis of phenols using biogenic Cu<sub>2</sub>O  
nanoparticles without using H<sub>2</sub>O<sub>2</sub>**

Rupom Borah, Eramoni Saikia, Sankar Jyoti Bora and Bolin Chetia\*

*Department of Chemistry, Dibrugarh University, Dibrugarh-786004, Assam, India*

*Email: [bolinchetia@dibru.ac.in](mailto:bolinchetia@dibru.ac.in).*

Tel.: +91-373-237-0210; fax: +91-373-237-0323;

**List of the Contents:**

1. Recyclability of the catalyst
2. Copies of  $^1\text{H}$  and  $^{13}\text{C}$  NMR spectra of the products.

**1. Recyclability of the catalyst:**

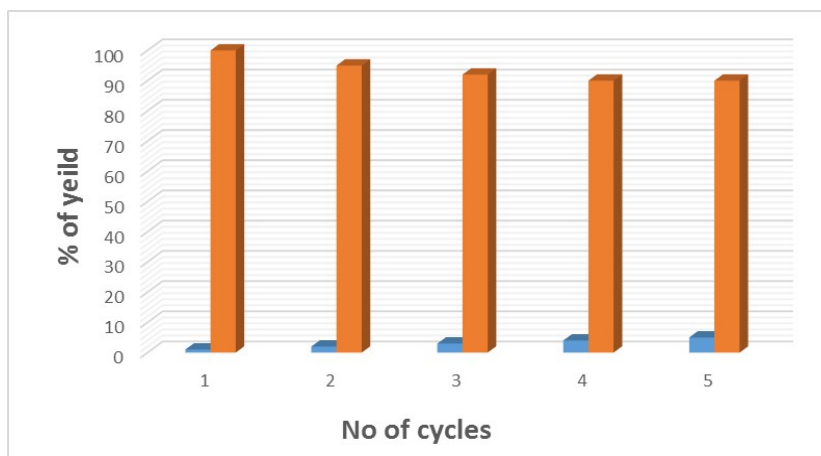

**Figure S1. Recyclability of the catalyst**

**Characterization of the products:**

**Phenol (Entry 1):** Brown liquid,  $^1\text{H-NMR}$  (400 MHz,  $\text{CDCl}_3$ ):  $\delta$  7.18- 7.30 (m, 2H), 6.94-6.78 (m, 3H), 5.30 (s, br, 1H) ppm;  $^{13}\text{C-NMR}$  (100 MHz,  $\text{CDCl}_3$ ):  $\delta$  155.4, 129.5, 120.6, 115.2 ppm;  $m/z = 94.042$ ; elemental Anal: C, 76.57; H, 6.43; O, 17.00.

**4-Methoxyphenol (Entry 2):** White gum, m.p. 56 °C;  $^1\text{H-NMR}$  (400 MHz,  $\text{CDCl}_3$ ):  $\delta$  6.84-6.74 (m, 4H), 4.62 (s, br, 1H), 3.81 (s, 3H) ppm;  $^{13}\text{C-NMR}$  (100 MHz,  $\text{CDCl}_3$ ):  $\delta$  155.5, 152.5, 116.1, 115.5, 55.5 ppm;  $m/z = 124.052$ ; elemental Anal.: C, 67.73; H, 6.50, O, 25.78.

**4-Nitrophenol (Entry 3):** Yellow solid, m.p. 112; °C  $^1\text{H-NMR}$  (400 MHz,  $\text{CDCl}_3$ ):  $\delta$  8.21 (d, 2H), 6.98 (d, 2H), 6.57 (s, br, 1H) ppm;  $^{13}\text{C-NMR}$  (100 MHz,  $\text{CDCl}_3$ ):  $\delta$  161.7, 141.3, 126.3, 115.8 ppm;  $m/z = 139.027$ ; elemental Anal: C, 51.80; H, 3.62; N, 10.07; O, 34.50.

**2-methylphenol (Entry 4)** Brown liquid,  $^1\text{H-NMR}$  (400 MHz,  $\text{CDCl}_3$ ):  $\delta$  7.13-7.06 (m, 2H), 6.84 (t, 1H), 6.77 (d, 1H), 6.12 (s, br, 1H), 2.35 (s, 3H) ppm;  $^{13}\text{C-NMR}$  (100 MHz,  $\text{CDCl}_3$ ):  $\delta$  154.5, 130.2, 127.3, 124.9, 121.3, 115.7, 14.9 ppm.  $m/z = 108.058$ ; elemental Anal: C, 77.75; H, 7.46; O, 14.80.

**3-Methoxyphenol (Entry 5):** Colorless oil,  $^1\text{H-NMR}$  (400 MHz,  $\text{CDCl}_3$ ):  $\delta$  7.13 (t, 1H), 6.50-6.41 (m, 3H), 5.34 (s, 1H), 3.77 (s, 3H) ppm;  $^{13}\text{C-NMR}$  (100 MHz,  $\text{CDCl}_3$ ):  $\delta$  161.2, 155.6, 131.5, 105.2, 104.5, 102.2, 55.3 ppm;  $m/z = 124.052$ ; elemental Anal: C, 67.73; H, 6.50; O, 25.78.

**4-Chlorophenol (Entry 6):** White gum,  $^1\text{H-NMR}$  (400 MHz,  $\text{CDCl}_3$ ):  $\delta$  7.19 (d, 2H), 6.77 (d, 2H), 4.87 (s, br, 1H) ppm;  $^{13}\text{C-NMR}$  (100 MHz,  $\text{CDCl}_3$ ):  $\delta$  154.2, 129.4, 125.5, 116.6 ppm;  $m/z = 128.003$ ; elemental Anal: C, 56.06; H, 3.92; Cl, 27.58; O, 12.45.

**4-Methylphenol (Entry 7):** Colourless gum,  $^1\text{H NMR}$  (400 MHz,  $\text{CDCl}_3$ ):  $\delta$  7.03 (d, 2H), 6.75 (d, 2H), 4.17 (s, br, 1H), 2.25 (s, 3H);  $^{13}\text{C NMR}$  (100 MHz,  $\text{CDCl}_3$ ):  $\delta$  155.7, 132.2, 130.3, 116.3, 21.4 ppm;  $m/z = 108.058$ ; elemental Anal: C, 77.75; H, 7.46; O, 14.80.

**Thiophen-2-ol (Entry 8):** Colorless oil,  $^1\text{H NMR}$  (400 MHz,  $\text{CDCl}_3$ ):  $\delta$  7.73 (t, 1H), 7.55-7.53 (m, 2H), 5.46 (s, br, 1H) ppm;  $^{13}\text{C-NMR}$  (100 MHz,  $\text{CDCl}_3$ ): 165.2, 131.6, 128.2, 111.2 ppm;  $m/z = 99.998$ ; elemental Anal: C, 47.98; H, 4.03; O, 15.98; S, 32.02

**4-Hydroxyacetophenone (Entry 9):** Powder, m.p. 110 °C; <sup>1</sup>H-NMR (400 MHz, *CDCl*<sub>3</sub>): δ 7.92(d, 2H), 6.93 (d, 2H), 5.55 (s, br, 1H), 2.56 (s, 3H) ppm; <sup>13</sup>C-NMR (100 MHz, *CDCl*<sub>3</sub>): δ 197.5, 161.2, 130.9, 129.5, 115.3, 26.1 ppm. m/z = 136.056; elemental Anal: C, 70.57; H, 5.92; O, 23.50.

**3-Methylphenol (Entry 10):** Colourless gum, <sup>1</sup>H-NMR (400 MHz, *CDCl*<sub>3</sub>): δ 7.13 (t, 1H), 6.75-6.62 (m, 3H), 4.98 (s, br, 1H), 2.25 (s, 3H) ppm; <sup>13</sup>C-NMR (100 MHz, *CDCl*<sub>3</sub>): δ 154.3, 139.2, 129.5, 122.6, 115.3, 112.4, 20.9 ppm; m/z = 108.058; elemental Anal: C, 77.75; H, 7.46; O, 14.80

**3-Nitrophenol (Entry 11):** Yellow Solid, m.p. 98 °C; <sup>1</sup>H-NMR (400 MHz, *CDCl*<sub>3</sub>): δ 7.81 (d, 1H), 7.70 (s, 1H), 7.41 (d, 1H), 7.18 (d, 1H) 5.59 (s, br, 1H) ppm; <sup>13</sup>C-NMR (100 MHz, *CDCl*<sub>3</sub>): δ 158.2, 149.6, 135.2, 121.2, 115.6, 110.2 ppm. m/z = 139.027; elemental Anal: C, 51.80; H, 3.62; N, 10.07; O, 34.50.

**Furan-2-ol (Entry 12):** Colorless oil, <sup>1</sup>H NMR (400 MHz, *CDCl*<sub>3</sub>): δ 7.72 (t, 1H), 7.12-6.67 (m, 2H), 5.57 (s, br, 1H) ppm; <sup>13</sup>C-NMR (100 MHz, *CDCl*<sub>3</sub>): 145.3, 141.2, 117.3, 116.2 ppm; m/z = 84.021; elemental Anal: C, 57.14; H, 4.80; O, 38.06

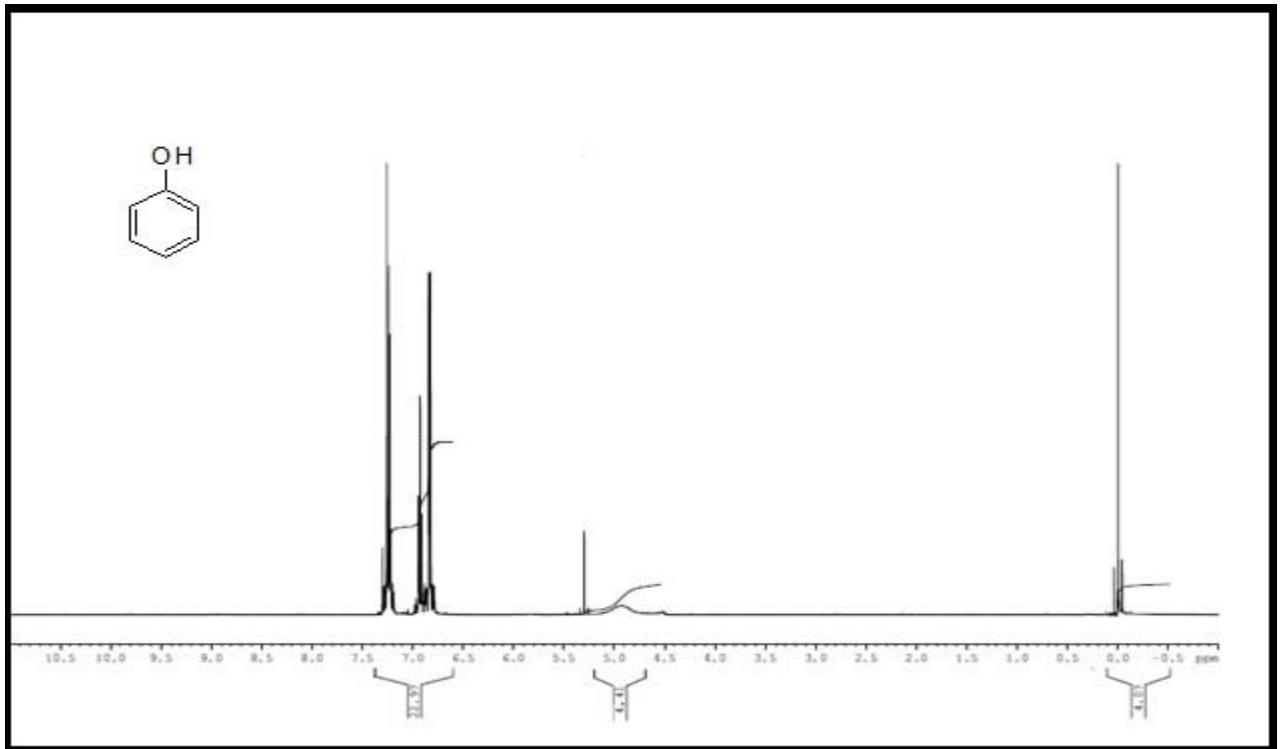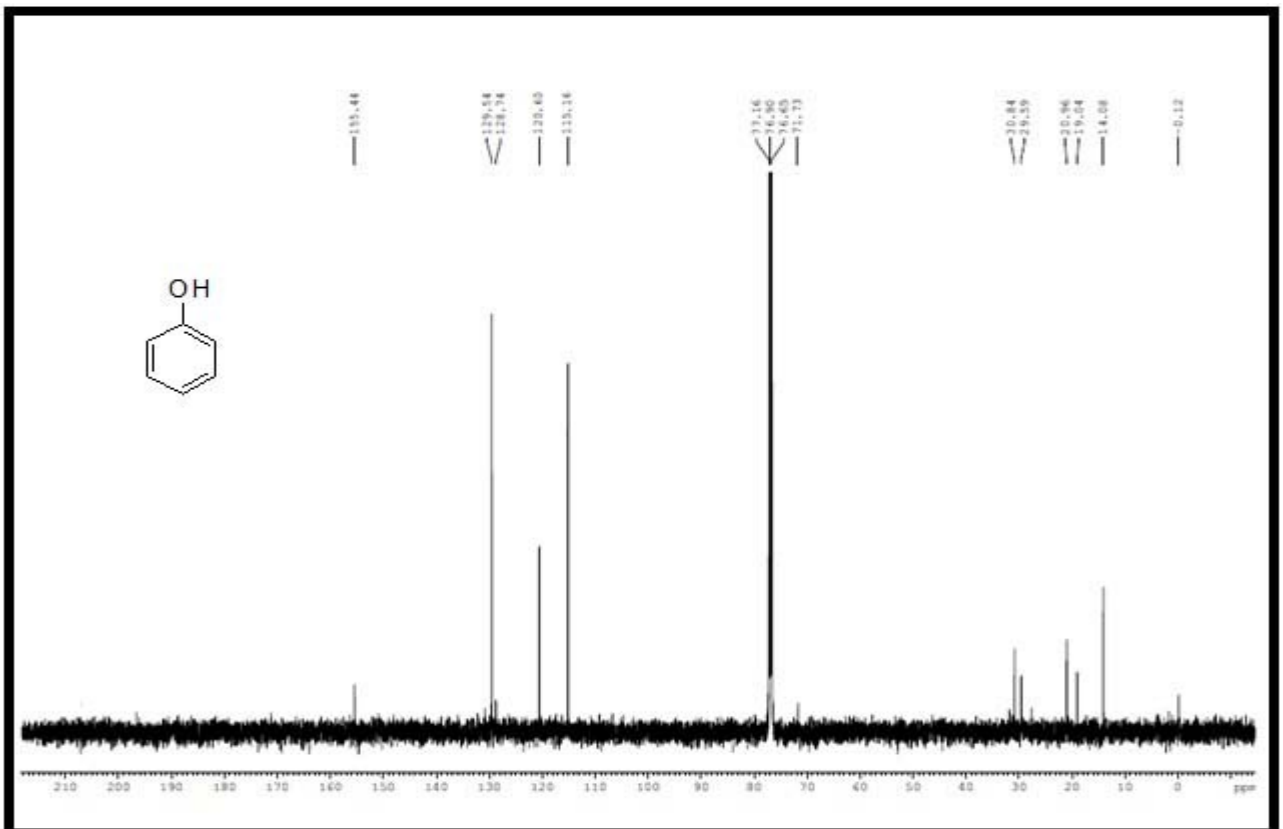

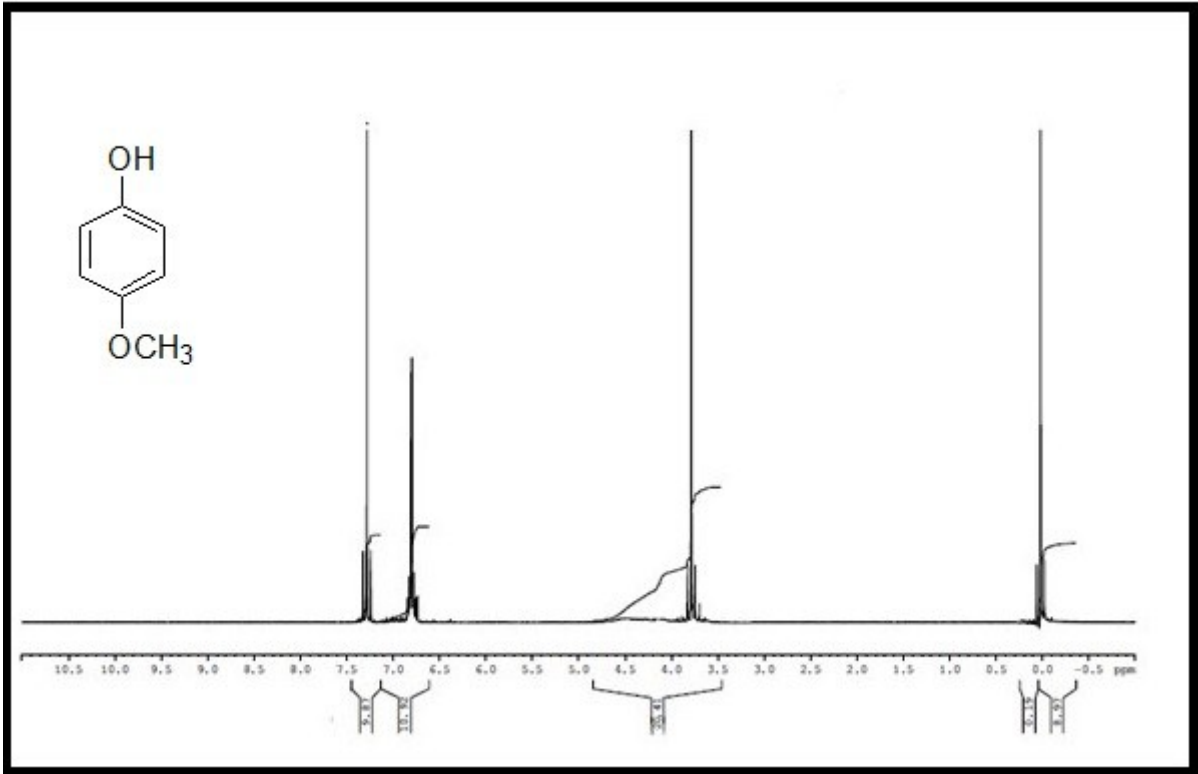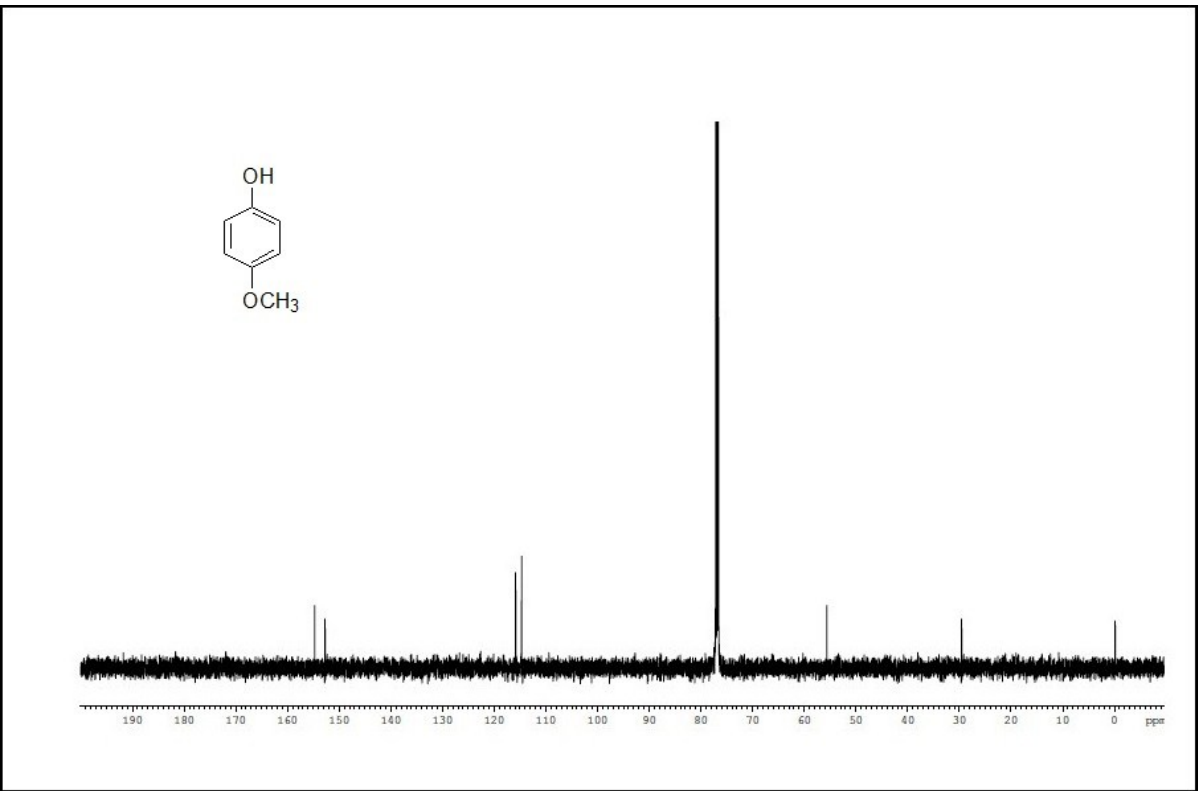

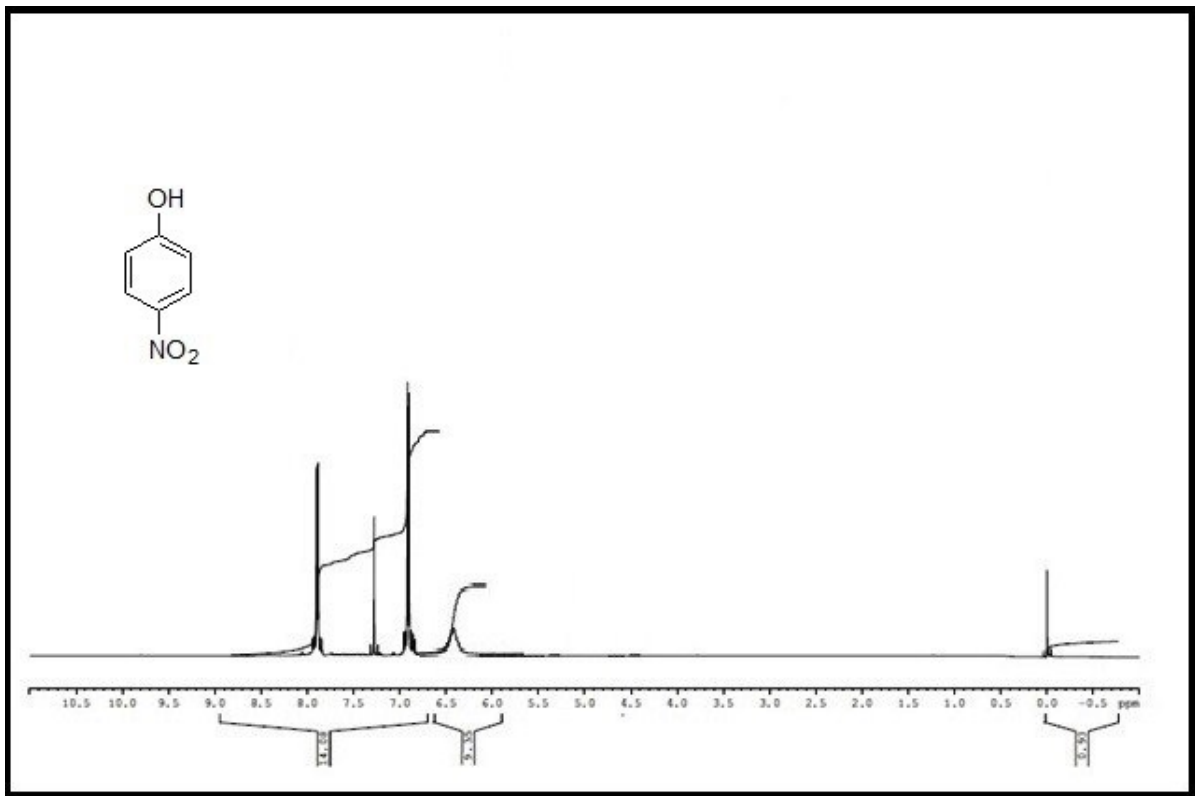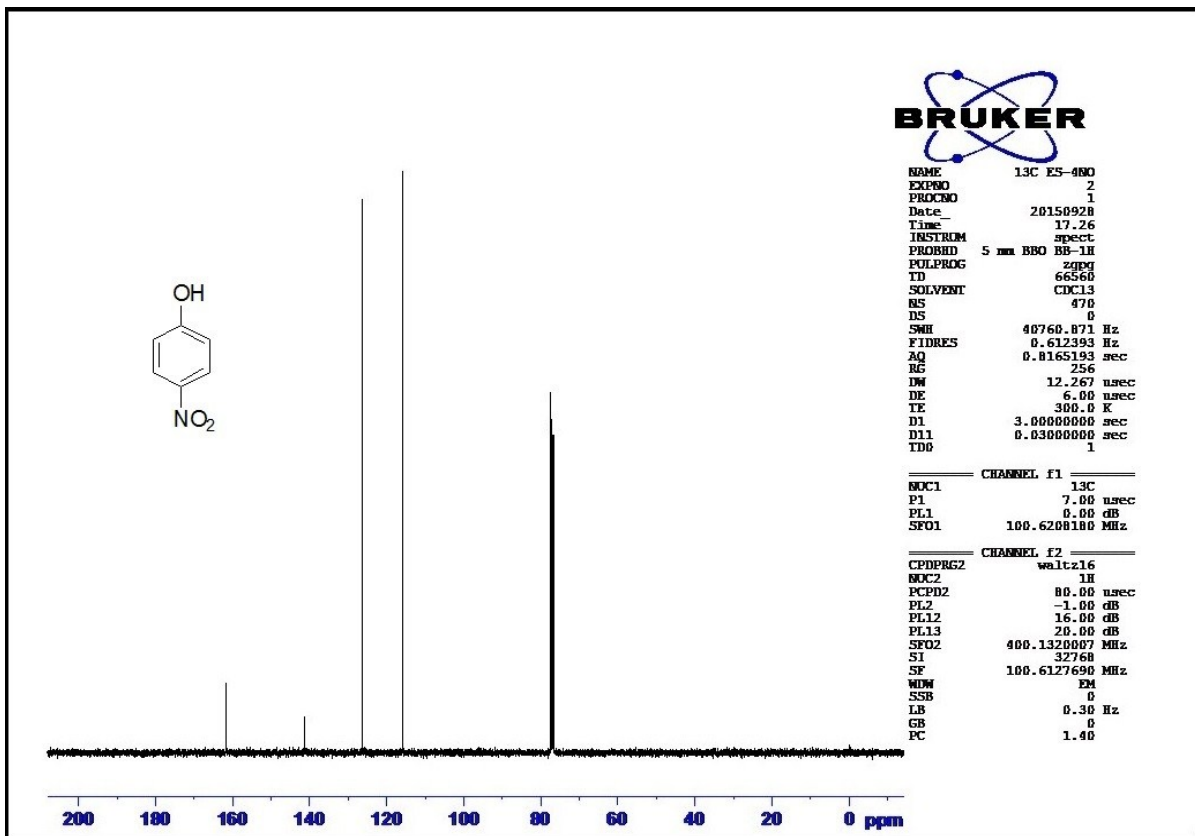

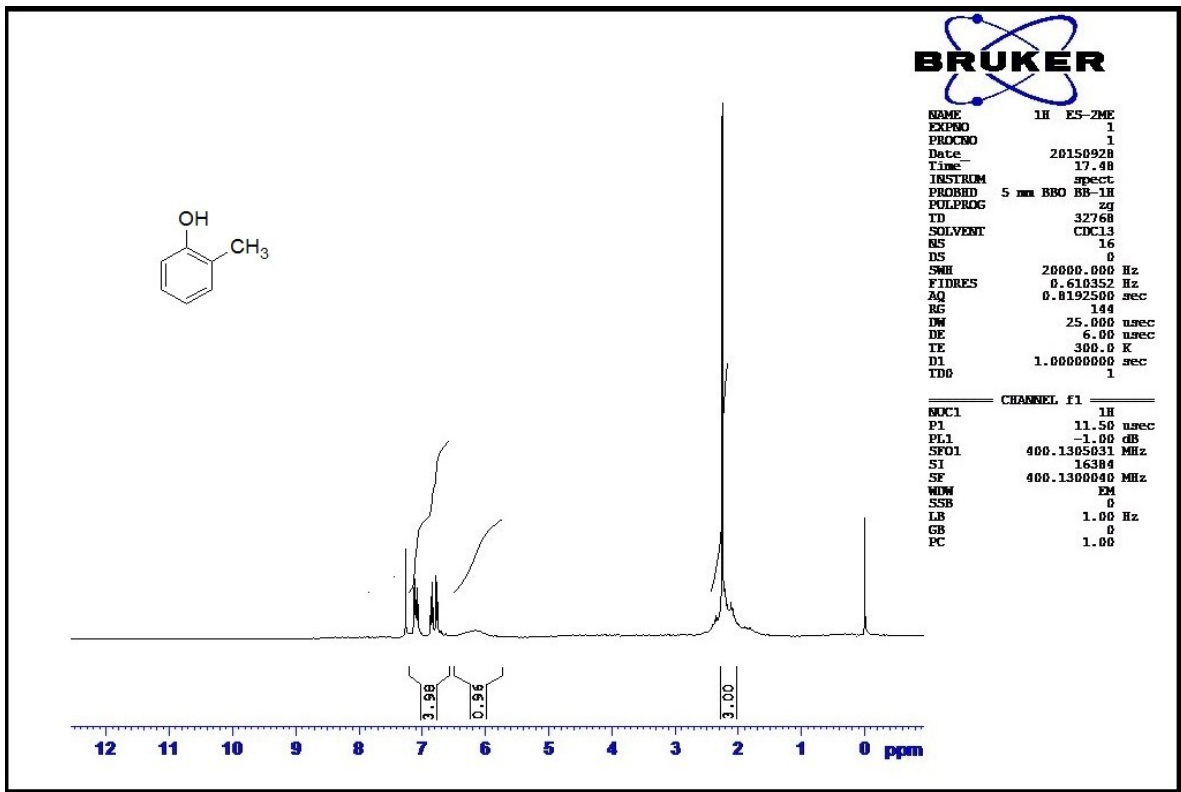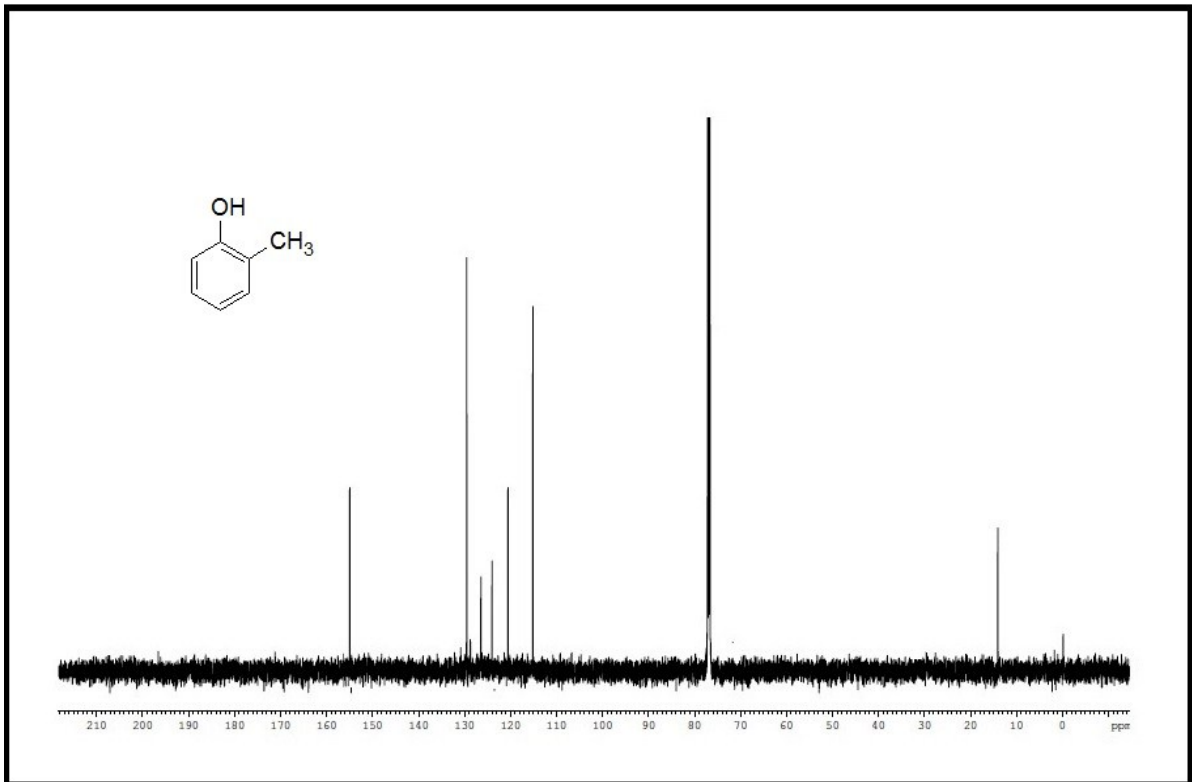



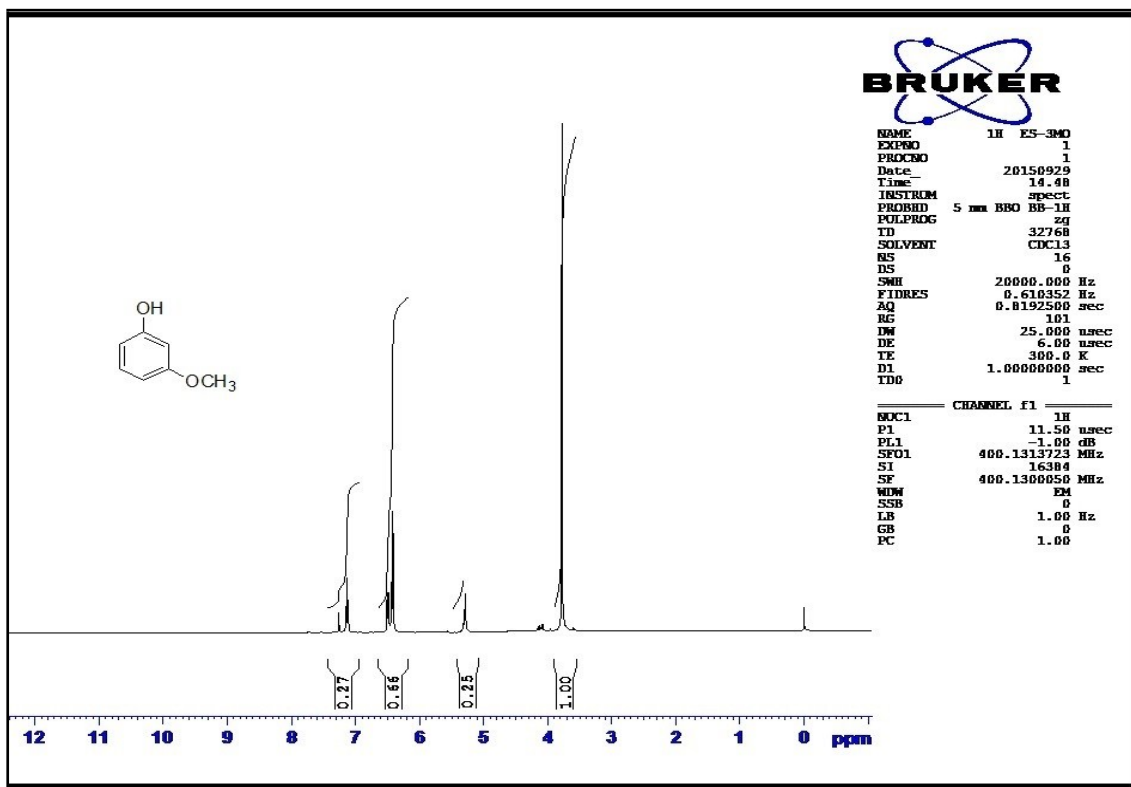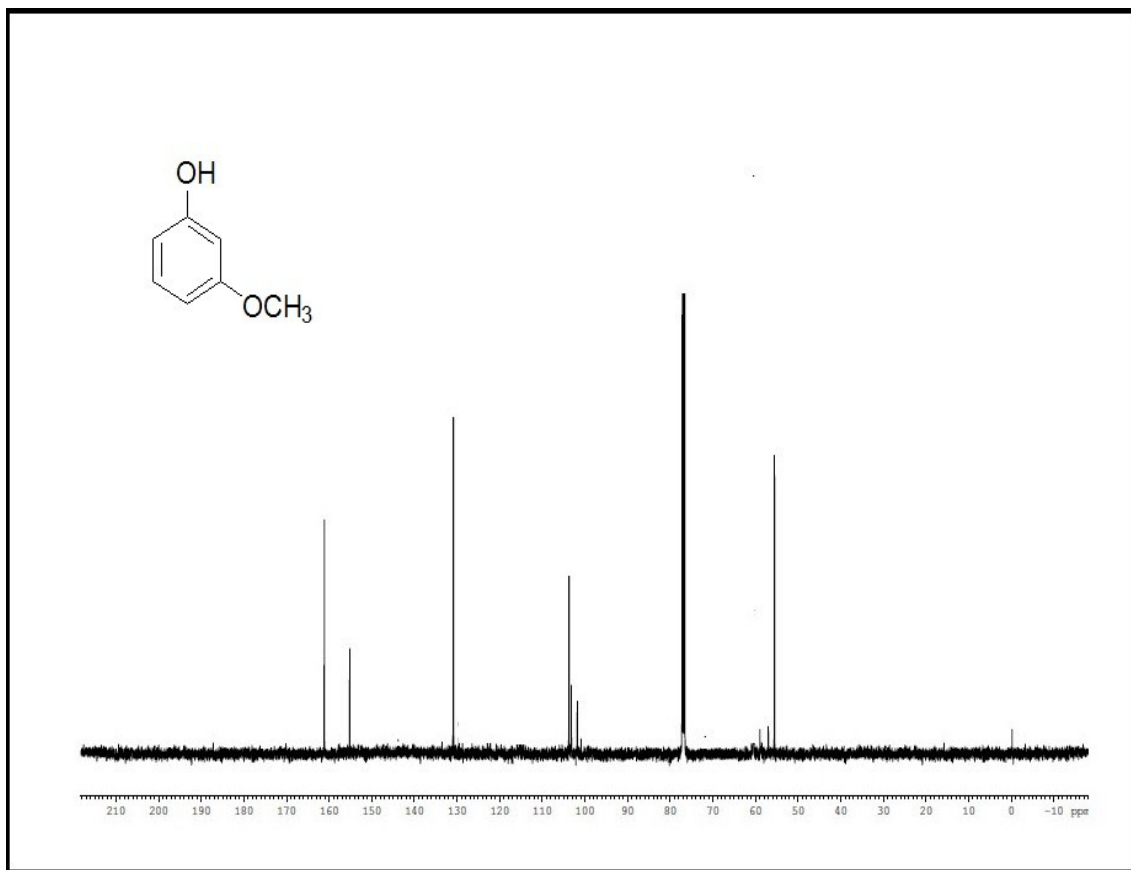

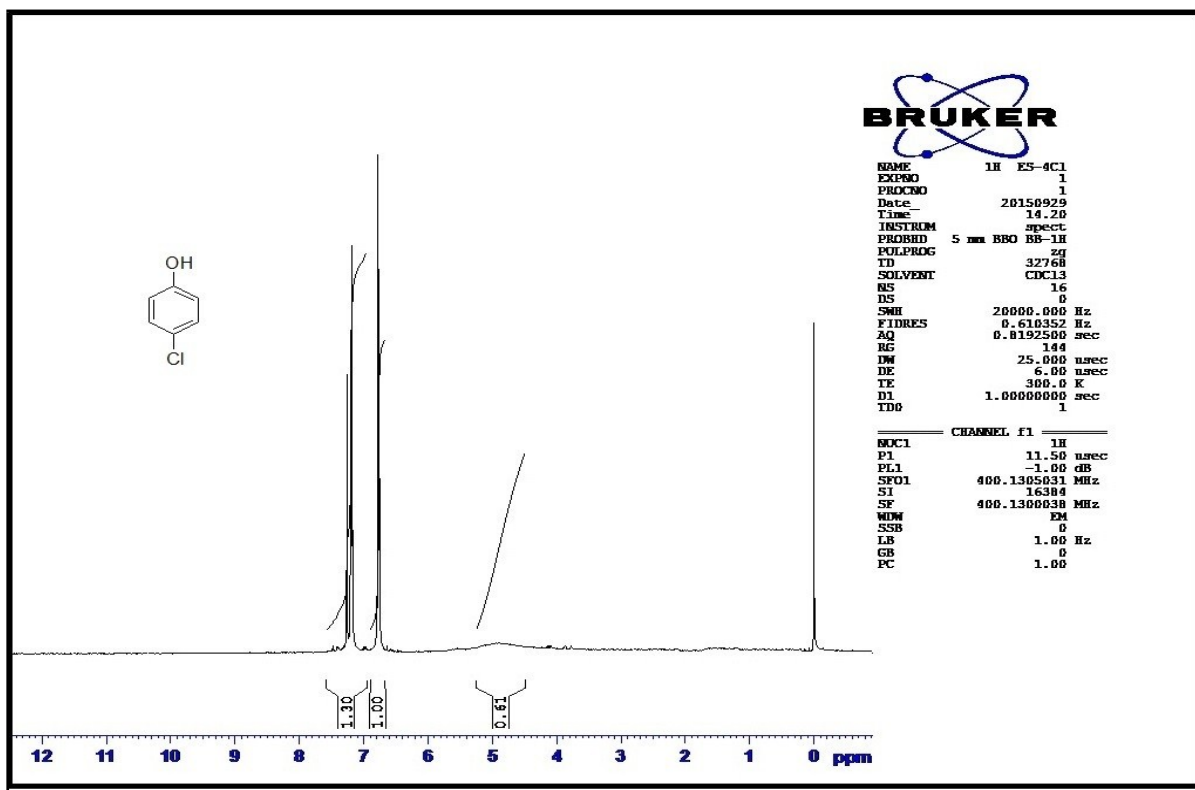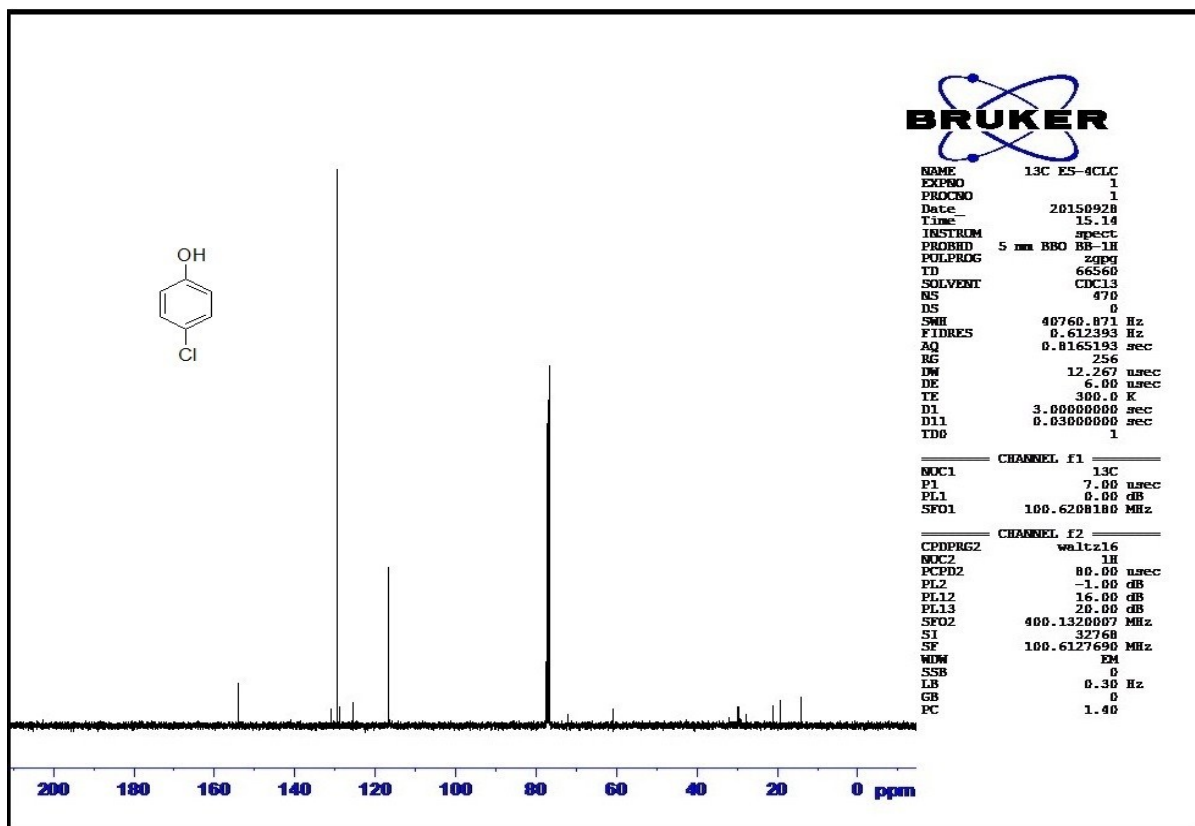

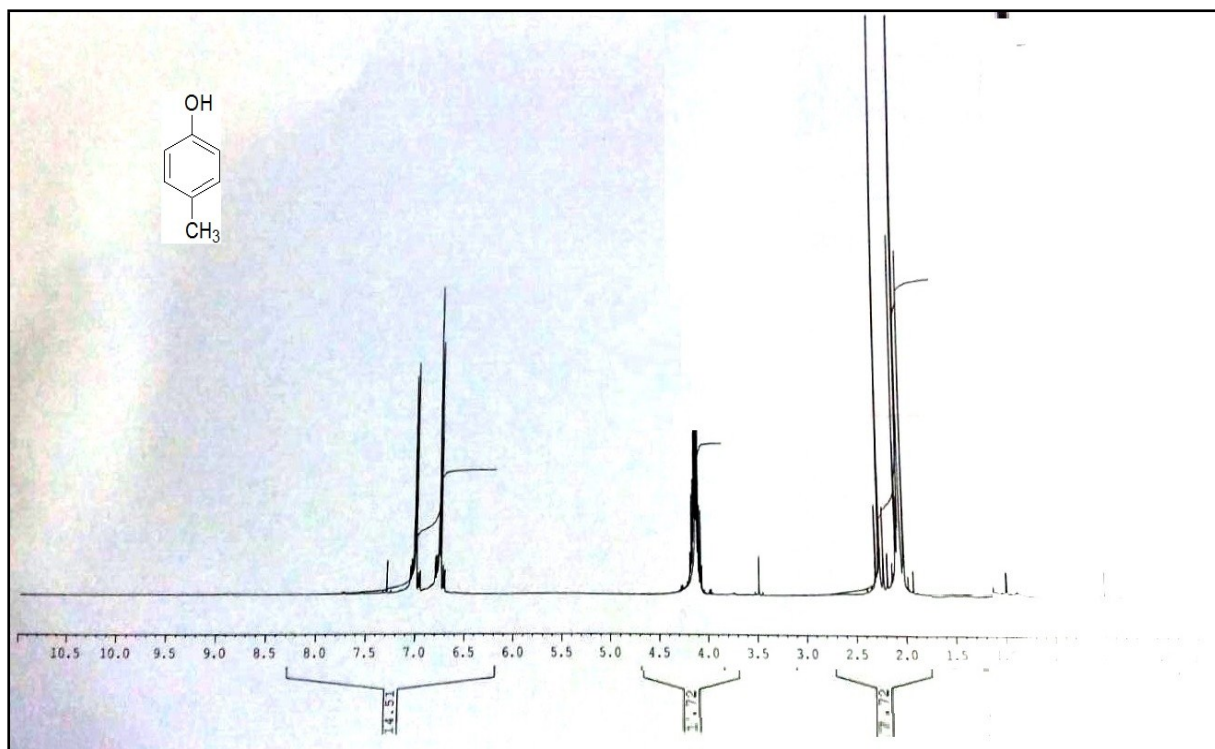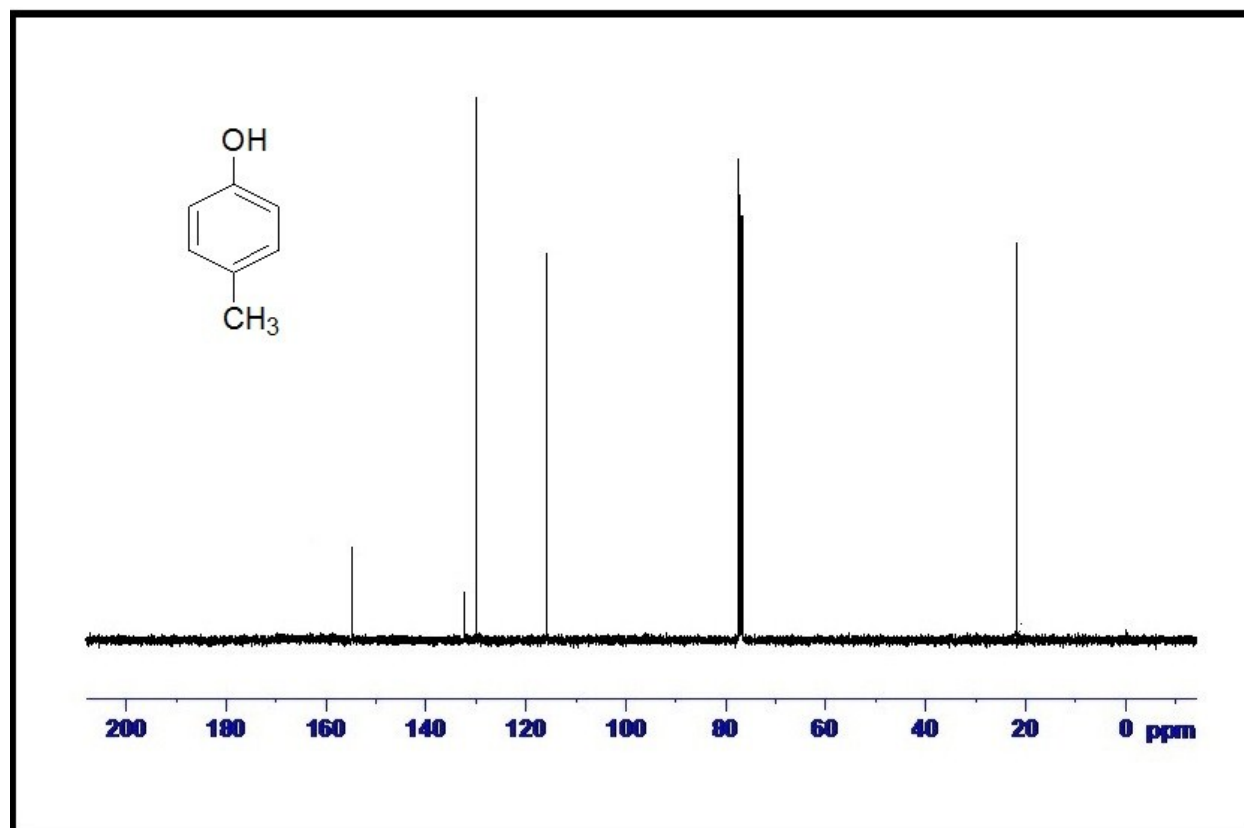

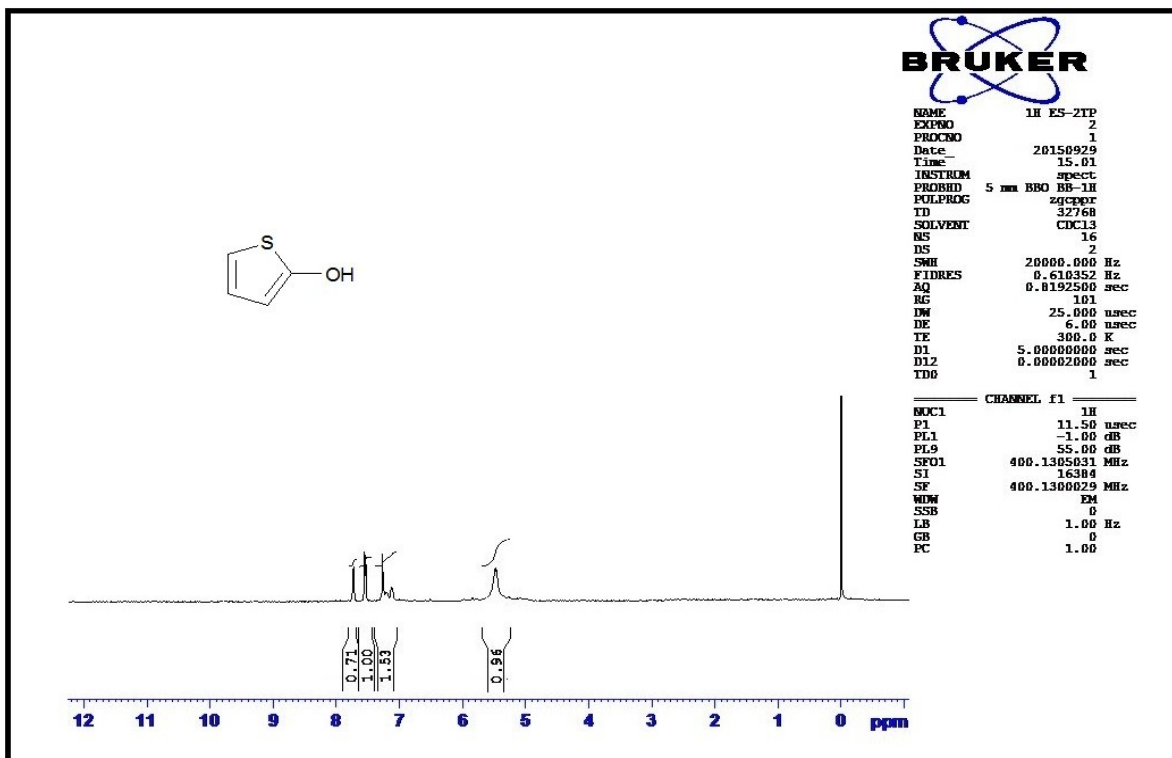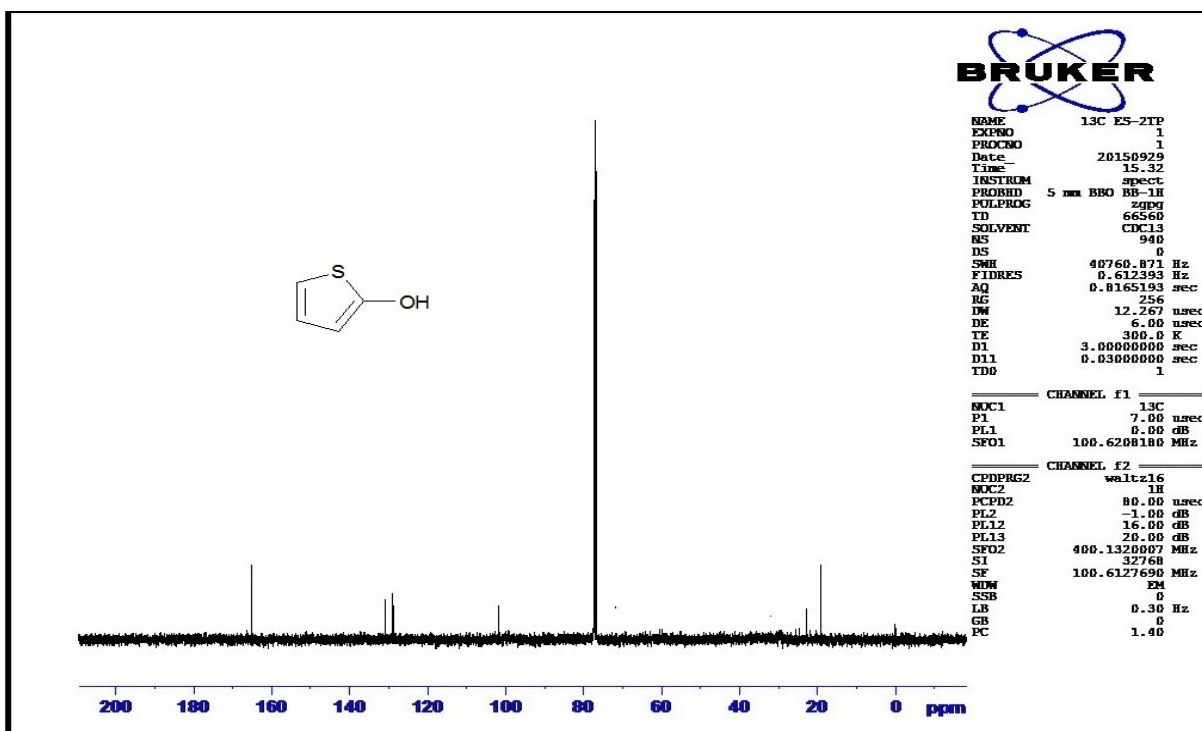

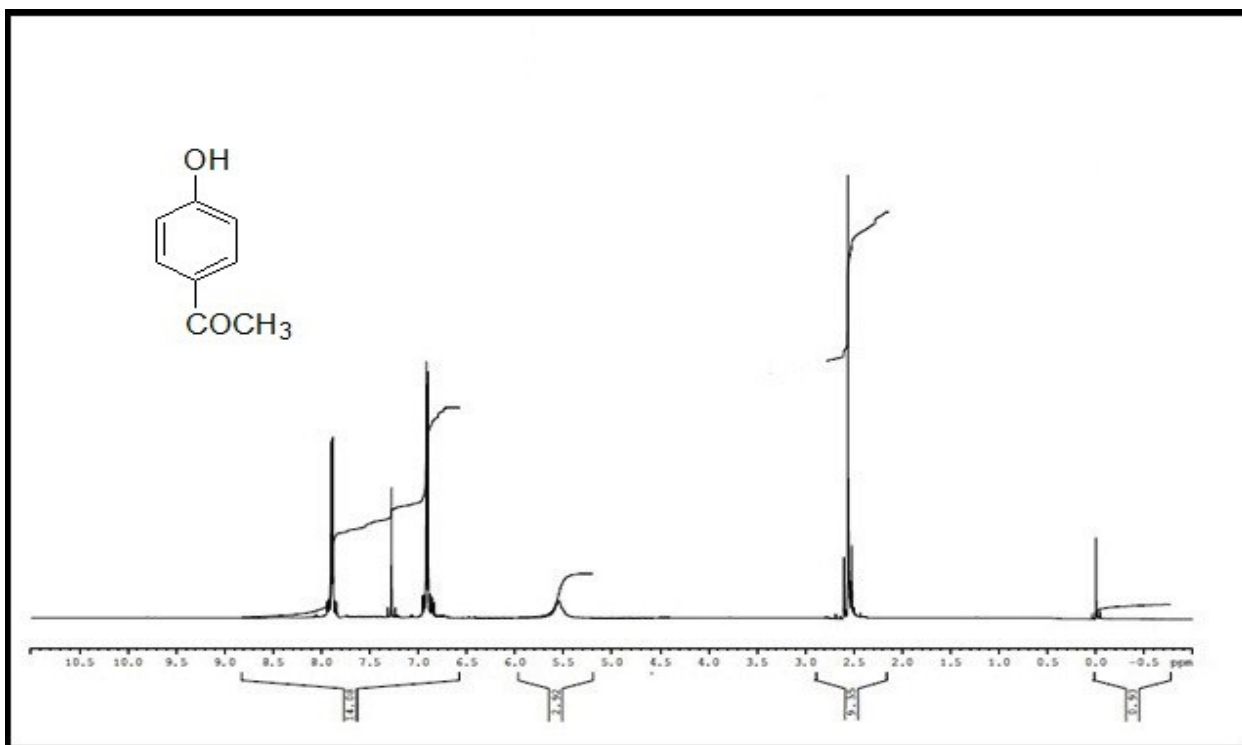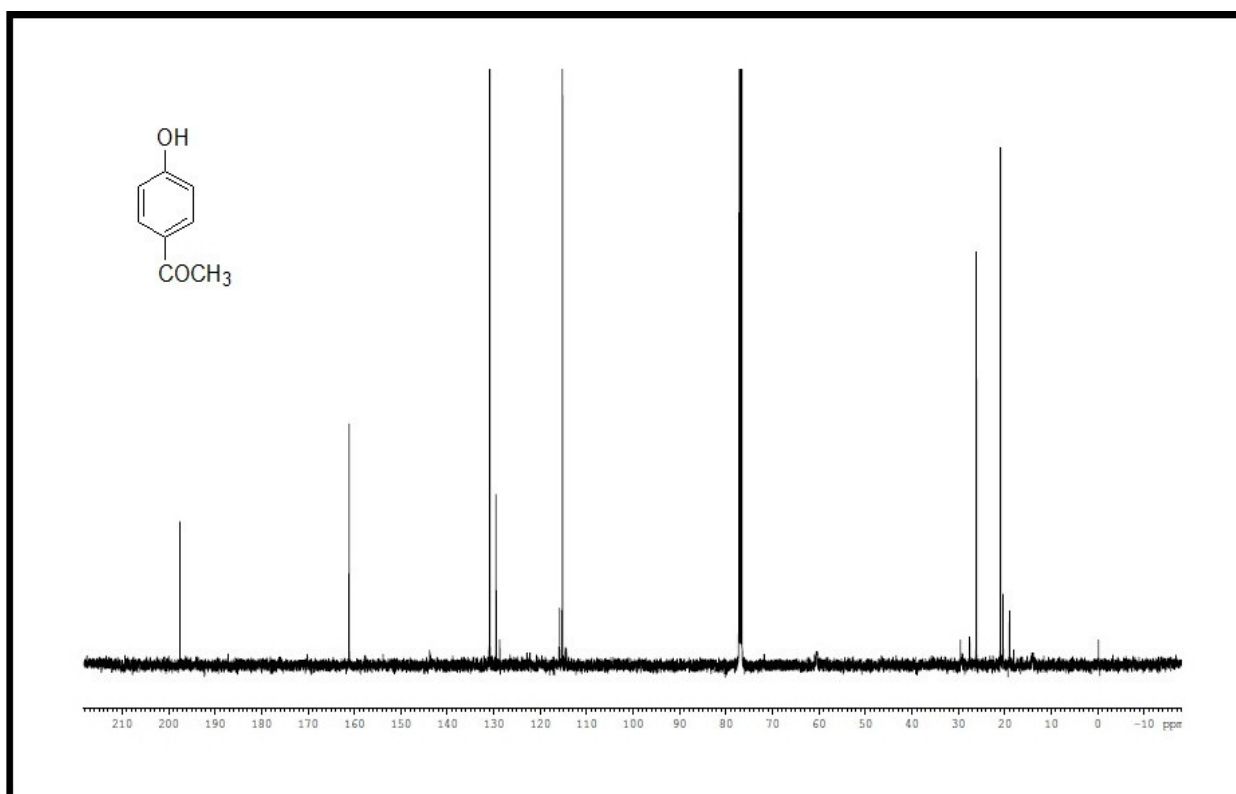

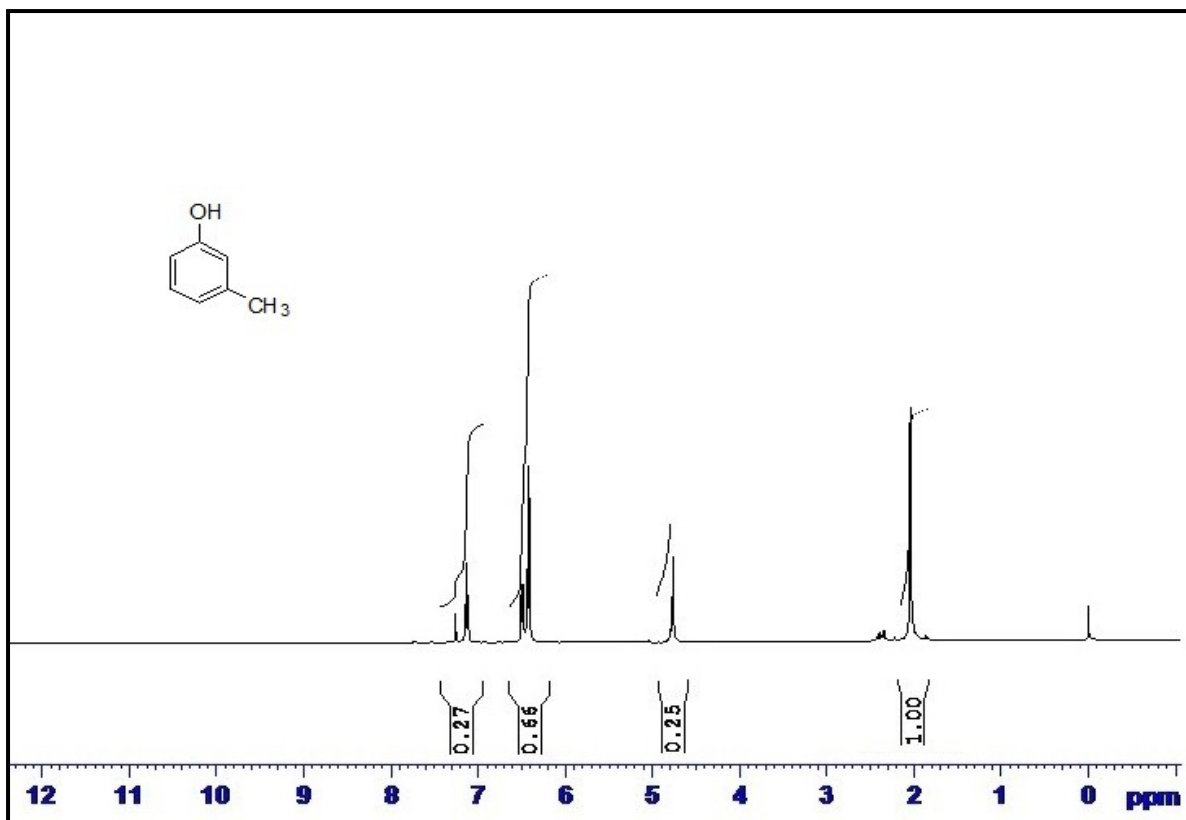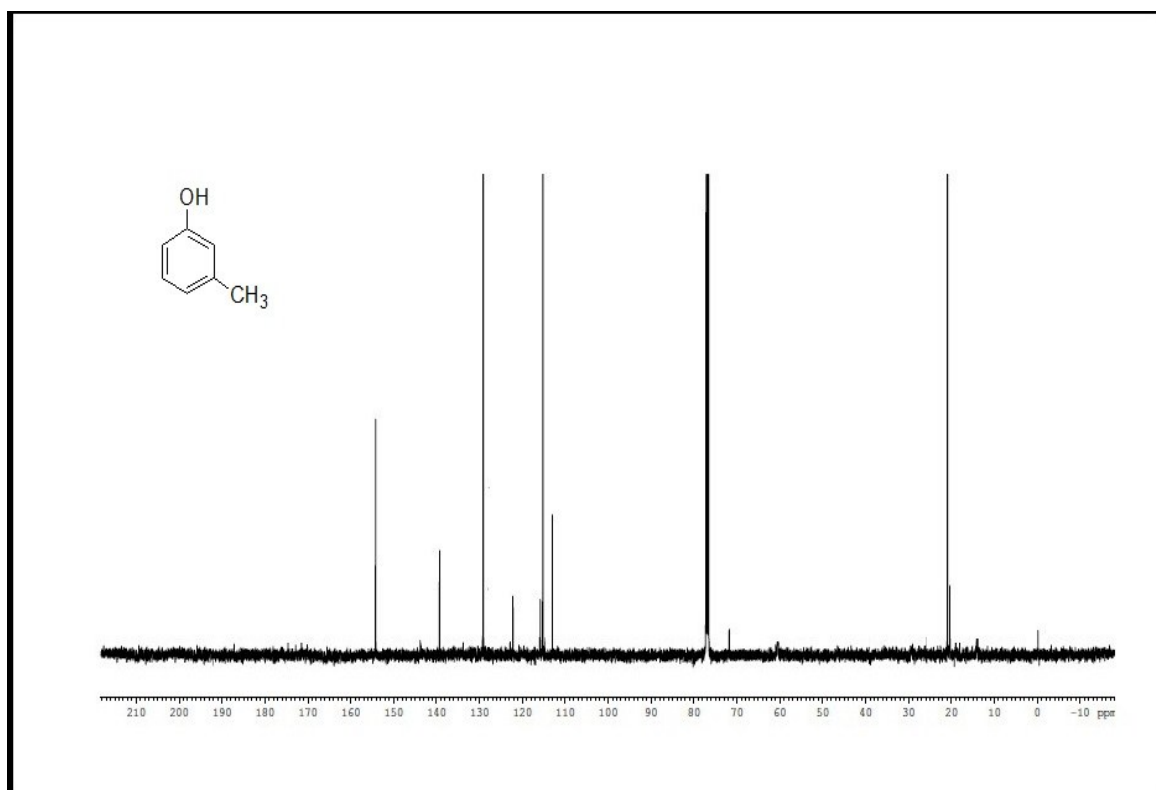

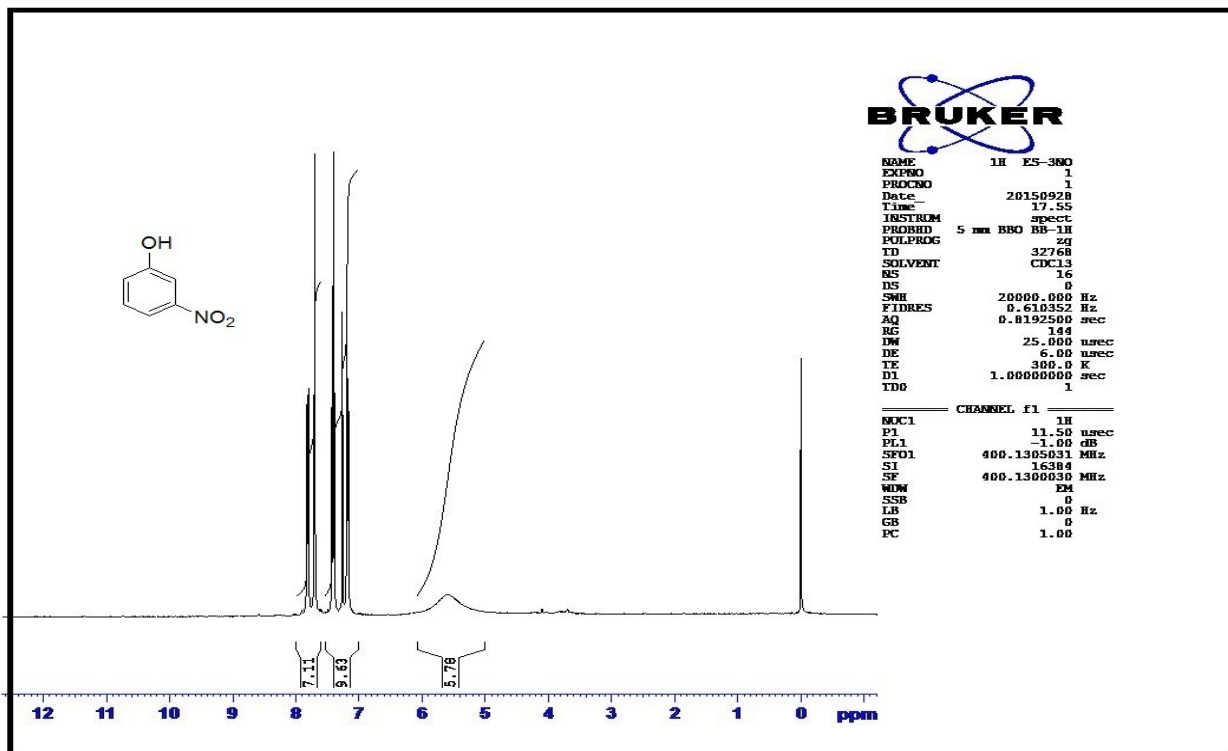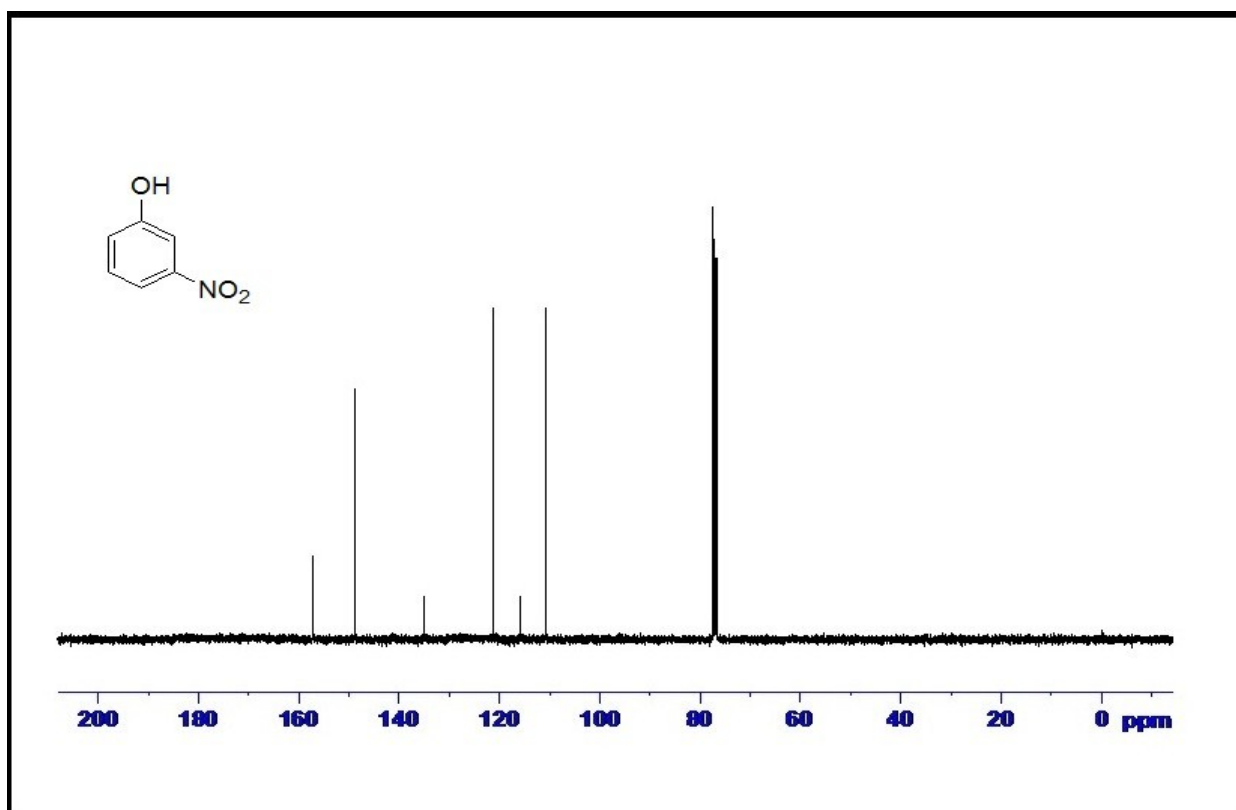

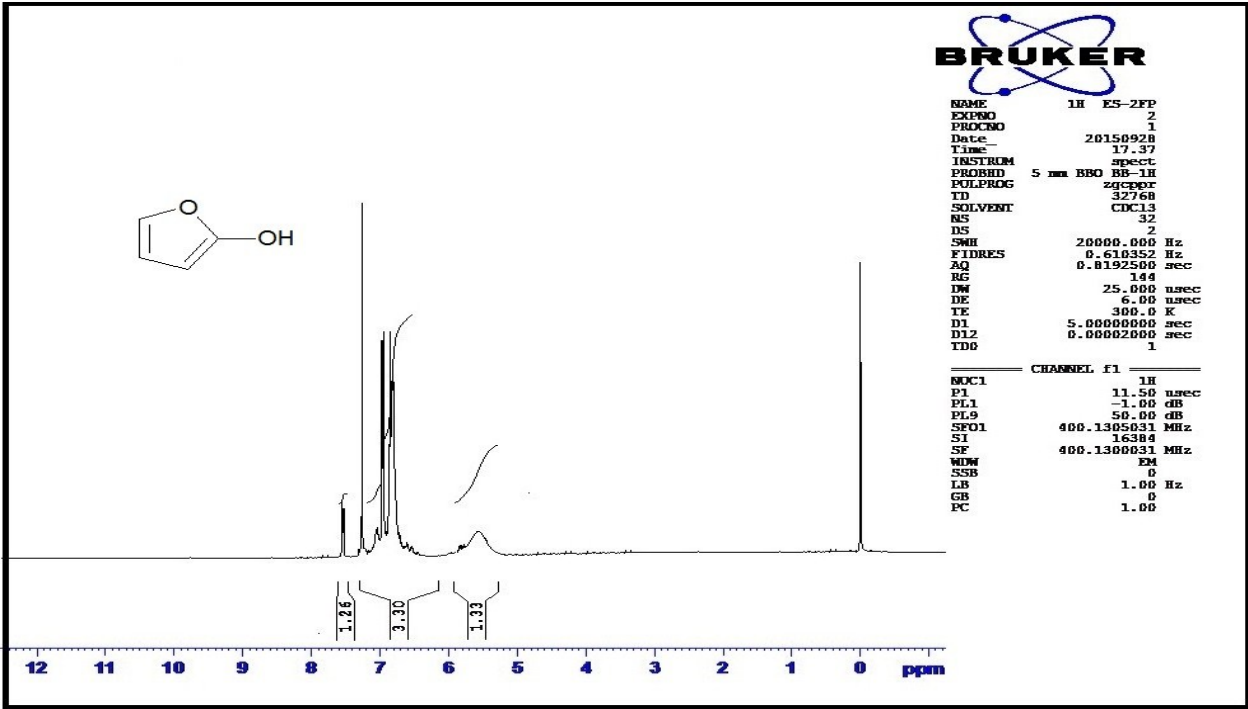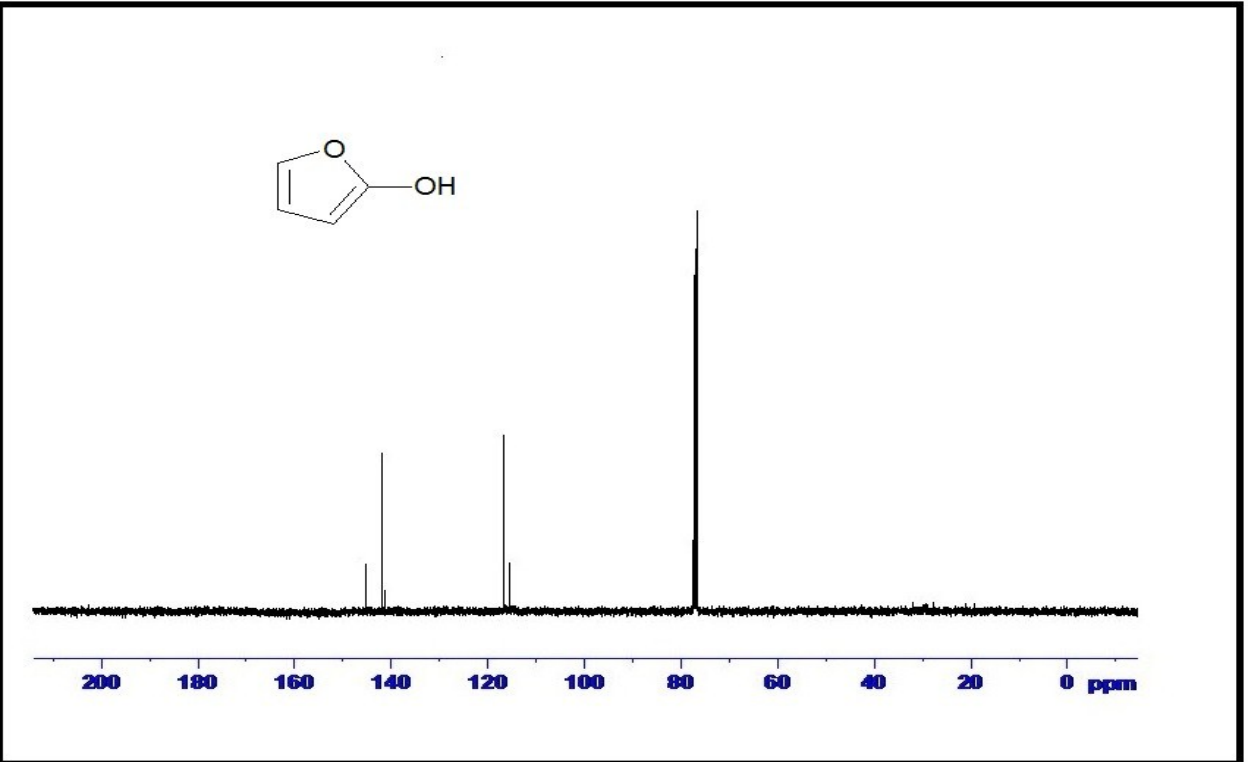

Supplement: c6ra22972g1.pdf [file c6ra22972g1.pdf]
